# Supplementary figures and images for: Automated assessment of pain in rats using a voluntarily accessed static weight-bearing test
Source: PubMed Central journal article supplement — Physiol Behav. Author manuscript; Available in PMC 2016 Nov 1. (PMC4586949; doi:10.1016/j.physbeh.2015.06.035), 2015-07-21

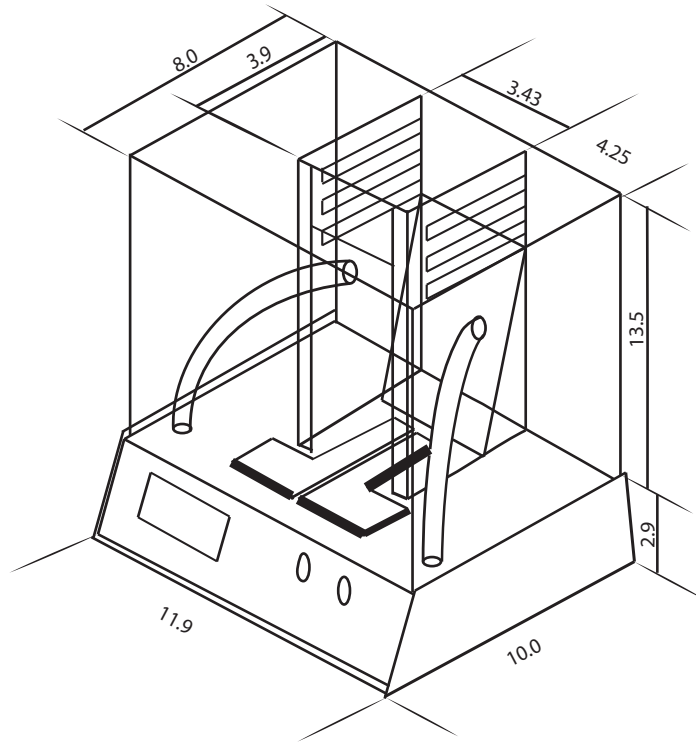

Supplement: NIHMS712286-supplement-2.pdf [file NIHMS712286-supplement-2.pdf]
